# Supplementary material for: Constructing S-deficient nickel sulfide/N-doped carbon interface for improved water splitting activity
Source: Royal Society of Chemistry journal article supplement (doi:10.1039/d3nr03256f), 2023-01-01
Supplement: d3nr03256f1.pdf [file d3nr03256f1.pdf]

**Constructing S-deficient nickel sulfide/N-doped carbon interface for improved water splitting activity**

Zhicheng Liu,<sup>a</sup> Hongrui Jia,<sup>a</sup> He Wang,<sup>a</sup> Yaqun Wang,<sup>\*a</sup> and Guoxin Zhang <sup>\*a</sup>

a. College of Energy Storage Technology, Shandong University of Science and Technology, Qingdao, Shandong 266590, China. E-mail: [yqwang@sdust.edu.cn](mailto:yqwang@sdust.edu.cn) and [zhanggx@sdust.edu.cn](mailto:zhanggx@sdust.edu.cn)

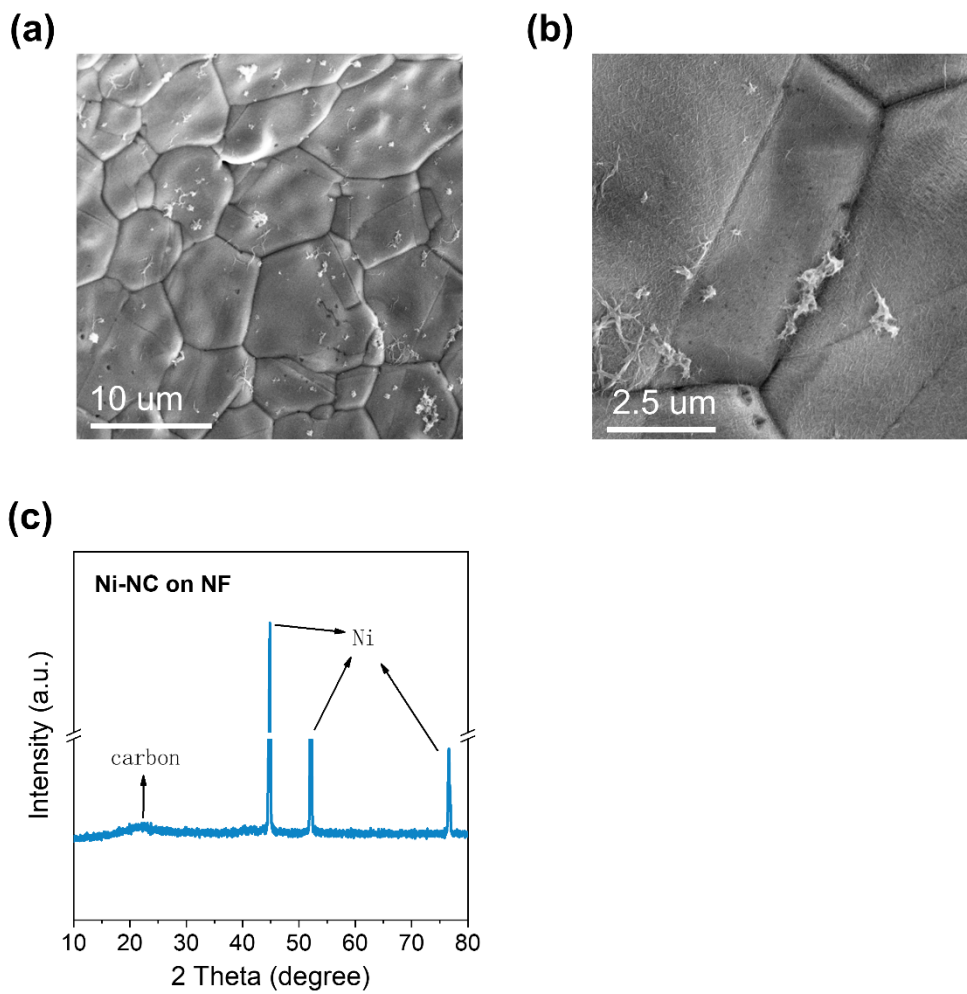

**Figure S1.** (a & b) SEM image and (c) XRD curve of precursive formamide-derived Ni-NC on nickel foam (NF)

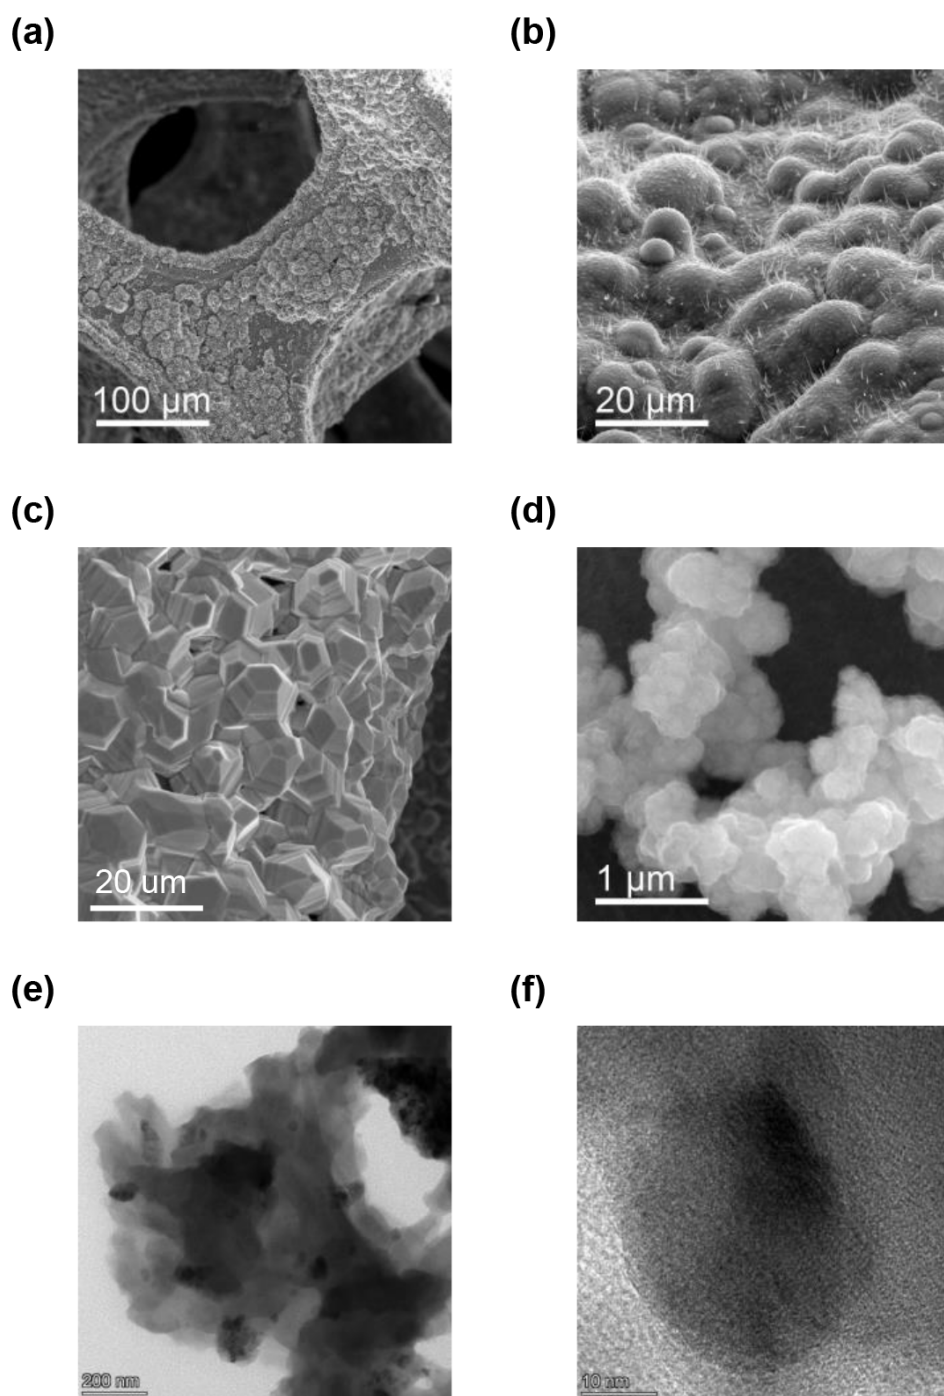

**Figure S2.** (a) SEM image and (b) enlarged SEM view of NiS-NC on nickel foam (NF). SEM image of (c) NiS@NF and (d) NiS@NC. (e & f) TEM images of NiS@NC

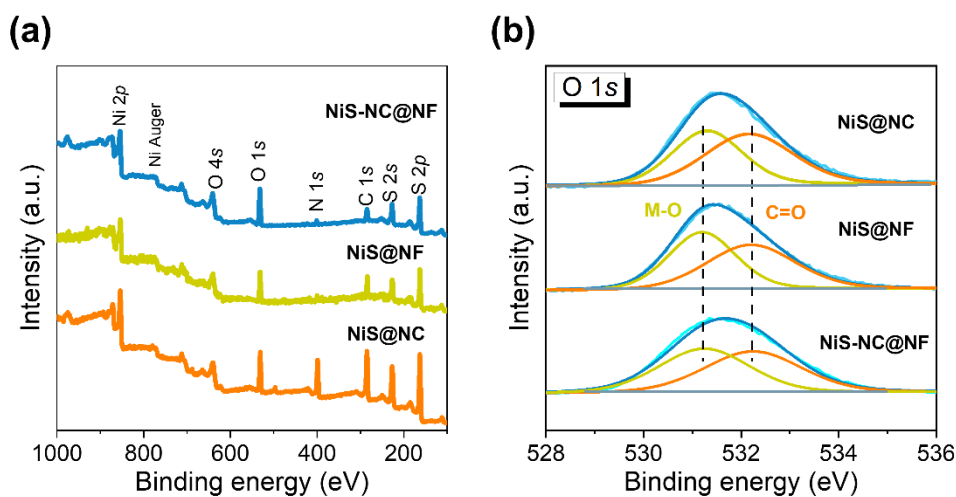

**Figure S3.** (a) XPS survey and (b) O 1s spectra of NiS-NC@NF and NiS@NC

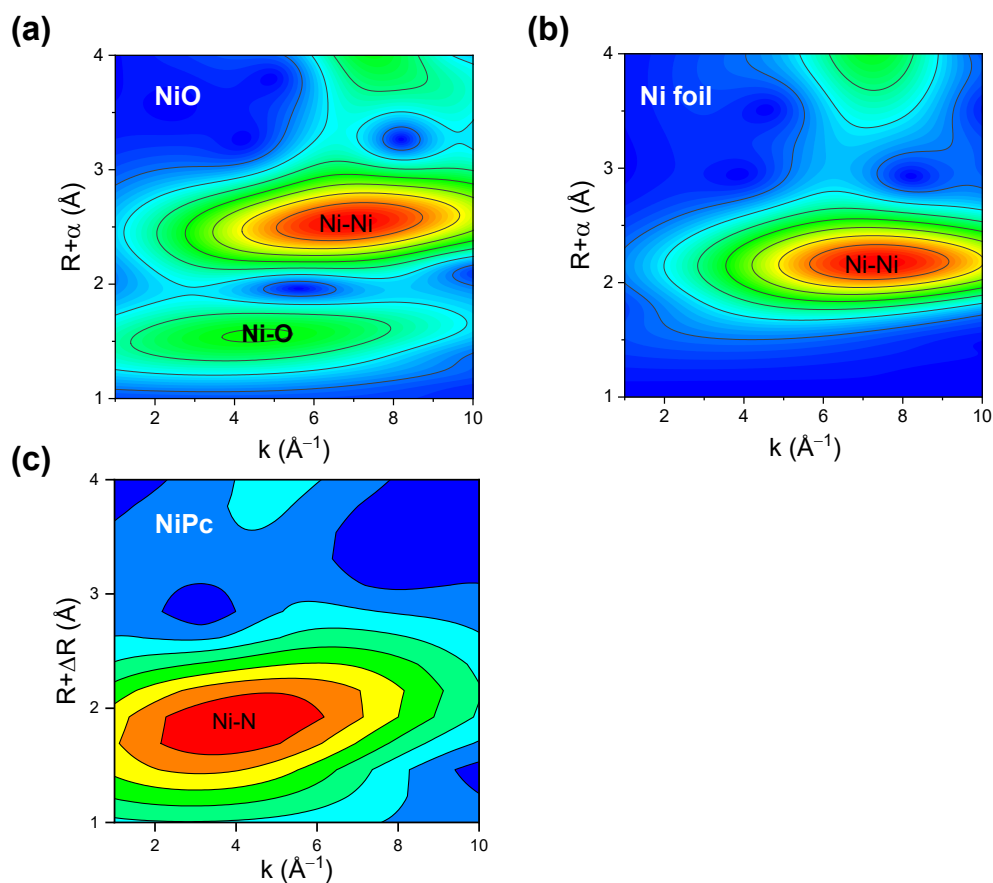

**Figure S4.** Wavelet transformed (WT) EXAFS of NiO, Ni foil, and NiPc references

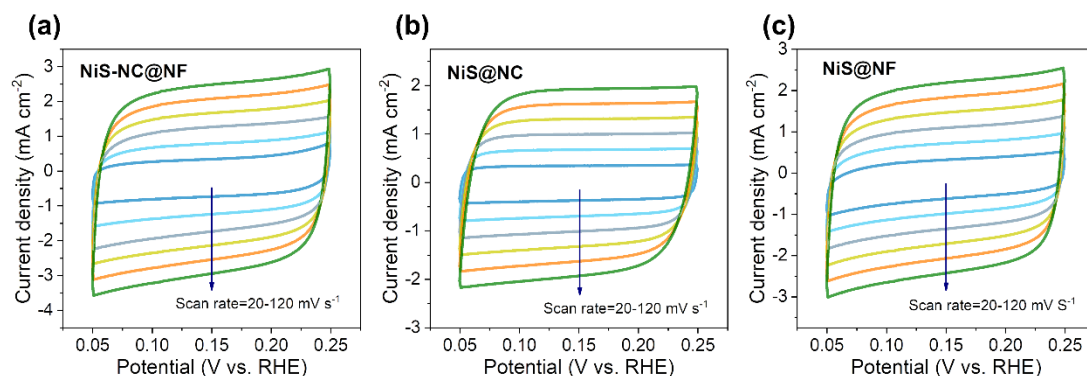

**Figure S5.** CV curves of (a) NiS-NC@NF, (b) NiS@NC and (c) NiS@NF measured at different scan rates.

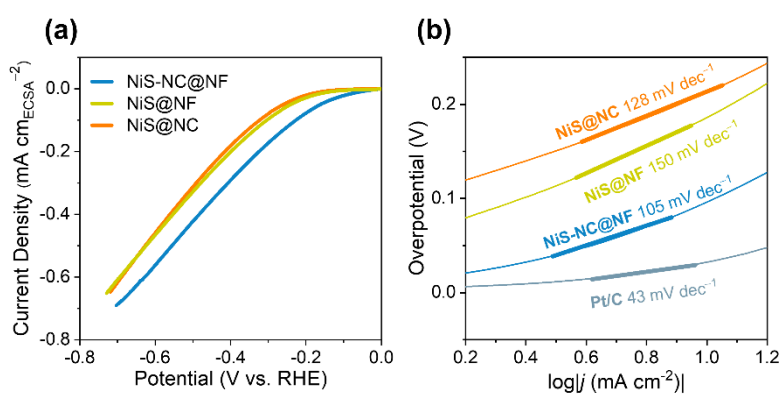

**Figure S6.** (a) HER polarization curves after normalized by ECSA and (b) Tafel plots of NiS-NC@NF and NiS@NC.

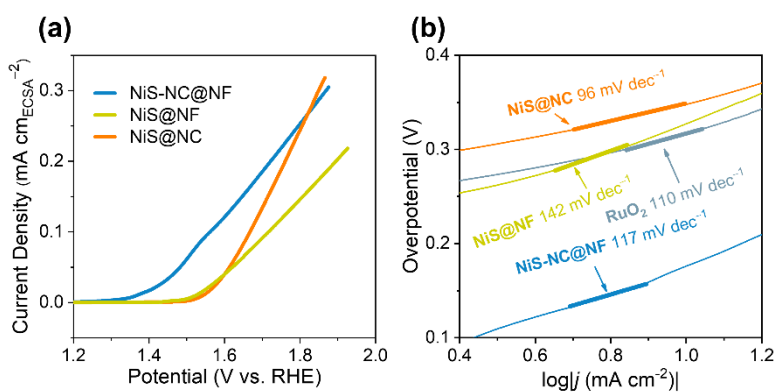

**Figure S7.** (a) OER polarization curves after normalized by ECSA and (b) Tafel plots of NiS-NC@NF and NiS@NC.

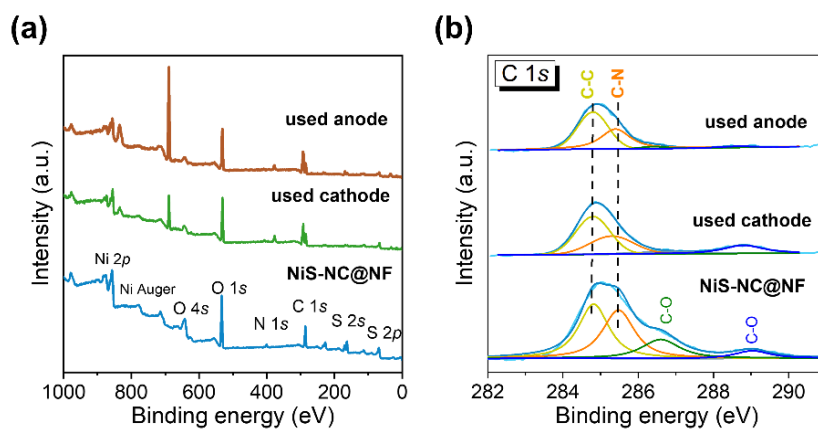

**Figure S8.** (a) XPS survey and (b) C 1s spectra of used NiS-NC@NF after long-term operation as anode and cathode for overall water splitting.

**Table S1.** XPS element contents of NiS@NC, NiS@NF and NiS-NC@NF

| Sample                        | Ni    | S     | C     | N     | O     |
|-------------------------------|-------|-------|-------|-------|-------|
| NiS@NF                        | 11.70 | 30.70 | 39.25 | -     | 18.35 |
| NiS@NC                        | 6.22  | 26.35 | 38.23 | 17.80 | 11.41 |
| NiS-NC@NF                     | 11.93 | 15.06 | 35.39 | 2.42  | 35.2  |
| Used NiS-<br>NC@NF<br>cathode | 12.6  | 4.98  | 29.13 | 4.83  | 48.46 |
| Used NiS-<br>NC@NF anode      | 13.68 | 8.29  | 25.97 | 2.52  | 49.54 |

**Table S2.** EXAFS fitting parameters at the Ni K-edge of samples ( $S_0^2=0.70, 0.77$ )

| Sample        | Shell | $N^a$    | $R$ (Å) <sup>b</sup> | $\sigma^2 \times 10^3$<br>(Å <sup>2</sup> ) <sup>c</sup> | $\Delta E_0$ (eV) <sup>d</sup> | $R$ factor |
|---------------|-------|----------|----------------------|----------------------------------------------------------|--------------------------------|------------|
| Ni foil       | Ni-Ni | 12*      | 2.48±0.01            | 6.2±0.2                                                  | 6.9±0.4                        | 0.001      |
| NiO           | Ni-O  | 6.0±0.7  | 2.08±0.01            | 5.2±0.9                                                  | -1.4±1.6                       | 0.004      |
|               | Ni-Ni | 12.6±0.7 | 2.95±0.01            | 6.0±0.3                                                  | -3.0±0.6                       |            |
| NiS           | Ni-S  | 3.9±0.4  | 2.26±0.01            | 6.9±0.9                                                  | 2.0±0.1                        | 0.001      |
|               | Ni-Ni | 1.8±0.4  | 2.52±0.01            | 5.5±1.3                                                  | 1.1±2.9                        |            |
| NiPc          | Ni-N  | 3.6±0.3  | 1.89±0.01            | 2.7±0.7                                                  | 1.33±1.1                       | 0.0133     |
| NiS-<br>NC@NF | Ni-S  | 1.9±1.2  | 2.18±0.04            | 8.1±7.3                                                  | 7.3±4.2                        | 0.008      |
|               | Ni-Ni | 2.1±1.6  | 2.46±0.03            | 5.9±4.1                                                  | 6.9±0.9                        |            |

<sup>a</sup> $N$ : coordination numbers; <sup>b</sup> $R$ : bond distance; <sup>c</sup> $\sigma^2$ : Debye-Waller factors; <sup>d</sup> $\Delta E_0$ : the inner potential correction.  $R$  factor: goodness of fitting.

**Table S3.** HER EIS calculation parameters of of NiS@NC, NiS@NF and NiS-NC@NF obtained by fitting the Nyquist plots of Figure S8.

| <b>Sample</b> | <b>Rs (<math>\Omega</math>)</b> | <b>Rct (<math>\Omega</math>)</b> | <b>CPE-T (mF)</b> | <b>CPE-P (mF)</b> |
|---------------|---------------------------------|----------------------------------|-------------------|-------------------|
| NiS@NF        | 2.09                            | 6.61                             | 0.11              | 0.74              |
| NiS@NC        | 2.14                            | 8.71                             | 0.13              | 0.85              |
| NiS-NC@NF     | 2.17                            | 3.82                             | 0.05              | 0.61              |

**Table S4.** OER EIS calculation parameters of of NiS@NC, NiS@NF and NiS-NC@NF obtained by fitting the Nyquist plots of Figure S8.

| <b>Sample</b> | <b>Rs (<math>\Omega</math>)</b> | <b>Rct (<math>\Omega</math>)</b> | <b>CPE-T (mF)</b> | <b>CPE-P (mF)</b> |
|---------------|---------------------------------|----------------------------------|-------------------|-------------------|
| NiS@NF        | 1.29                            | 11.01                            | 0.08              | 0.68              |
| NiS@NC        | 1.53                            | 12.09                            | 0.09              | 0.81              |
| NiS-NC@NF     | 1.27                            | 4.21                             | 0.06              | 0.54              |
